# Supplementary material for: Activating room-temperature phosphorescence of 1,8-naphthalimide by doping into aromatic dicarboxylic acids
Source: Royal Society of Chemistry journal article supplement (doi:10.1039/d2cc00474g), 2022-01-01
Supplement: d2cc00474g1.pdf [file d2cc00474g1.pdf]

## Supporting Information

### Activating room-temperature phosphorescence of 1,8-naphthalimide by doping into aromatic dicarboxylic acid

Xiangming Wang,<sup>a</sup> Zepeng Wang,<sup>a</sup> Hua Feng,<sup>a</sup> Chong Yang Lin,<sup>b</sup> Huifang Shi,<sup>\*,b</sup> Zhongfu An,<sup>b</sup> Zhong-Min Su<sup>c</sup> and Fu-Shun Liang<sup>\*,a</sup>

<sup>a</sup>Institute of Organic Luminescent Materials (IOLM), College of Chemistry, Liaoning University, Shenyang 110036, P. R. China. E-mail: fsliang@lnu.edu.cn

<sup>b</sup>Key Laboratory of Flexible Electronics (KLOFE) & Institute of Advanced Materials (IAM), Jiangsu National Synergistic Innovation Center for Advanced Materials (SICAM), Nanjing Tech University (Nanjing Tech), Nanjing 211800, P. R. China. E-mail: iamhfshi@njtech.edu.cn

<sup>c</sup>School of Chemistry and Environmental Engineering, Changchun University of Science and Technology, 7989 Weixing Road, Changchun 130022, China.

## Contents

### 1. Experimental details

### 2. Supporting Figures and Tables

## 1. Experimental details

UV-visible absorption spectra were obtained using Perkin Elmer Lambda35. Steady-state fluorescence/phosphorescence spectra and excitation spectra were measured using Hitachi F-4600. The lifetimes and time-resolved emission spectra were carried out on the Edinburgh FLSP 920 fluorescence spectrophotometer equipped with a xenon arc lamp (Xe 900) and microsecond flash-lamp ( $\mu$ F 900), respectively. Photoluminescence quantum efficiency was measured by an integrating sphere on a Hamamatsu Absolute PL Quantum Yield Spectrometer C11347 under ambient condition. The phosphorescence efficiencies of all compounds were obtained following the equation of

$$\Phi_{phos} = B/A \times \Phi_{PL} \quad (1)$$

Where A and B represent the integral area of total photoluminescence and phosphorescence spectra, respectively. The phosphorescence was separated from the total photoluminescence (PL) spectrum based on the phosphorescence spectrum for phosphorescence quantum yields.<sup>1</sup>  $\Phi_{PL}$  represents the absolute photoluminescence quantum yields of compounds in solid-state. Luminescence photos and videos were taken by Cannon EOS 800D single lens digital cameras with a hand-held UV-lamp on and off.

**Material synthesis.** Materials unless other mentioned, all the materials used in the experiments, including 1,8-naphthalimide(**NI**), phthalic acid (**PA**), isophthalic acid (**IPA**), and terephthalic acid (**TPA**), were purified by recrystallization for three times to prevent impurities caused luminescence, and all other solvents were purchased from commercial source.

**NI-based organic afterglow composites:** The **NI**-based composites including **NI@PA** (**NI** dispersed in **PA**), **NI@IPA** (**NI** dispersed in **IPA**), and **NI@TPA** (**NI** dispersed in **TPA**) were prepared in a standard procedure. Take **NI@PA** as an example. Firstly, 1.97 mg **NI** was dissolved in 4.5 mL MeCN to afford a 0.44 mg/mL solution of **NI**. Secondly, 8.30 g crystals of **PA** was added, followed the addition of 6 mL deionized water and 18 mL ethanol. Thirdly, the mixture was heated to 85 °C and keeping for 45 min. Finally, the solvents were removed under reduced pressure and the obtained solid mixture was dried by under vacuum at 60 °C for 24 h to get the composite of **NI@PA** crystal with **NI** content of 0.02 mol%. **NI@IPA**, **NI@TPA** was prepared following the same procedure as **NI@PA**.

**The detail for the security protection application.** The screen printing process was adopted for patterning. The ink based on ground **NI@PA**, **NI@IPA** or **NI@TPA** powder was firstly prepared with aloe vera gel. Then the ink was printed onto a piece of filter paper. After dry treatment for 30 minutes, a pattern with UOP feature was obtained.

## 2. Supporting Figures and Tables

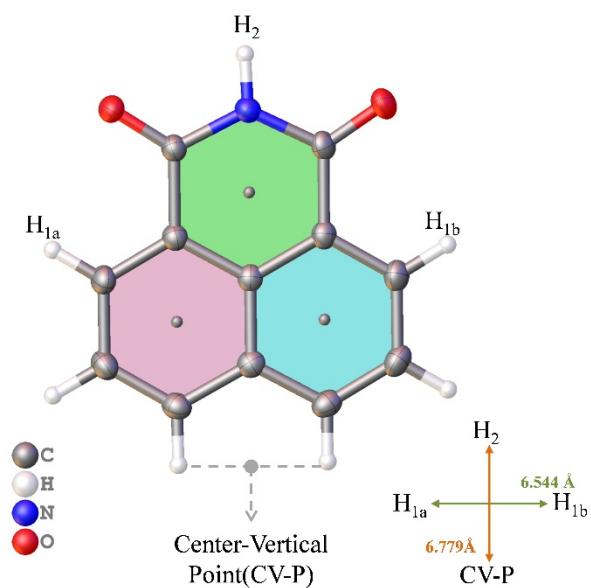

**Fig. S1** The NI molecular geometry.

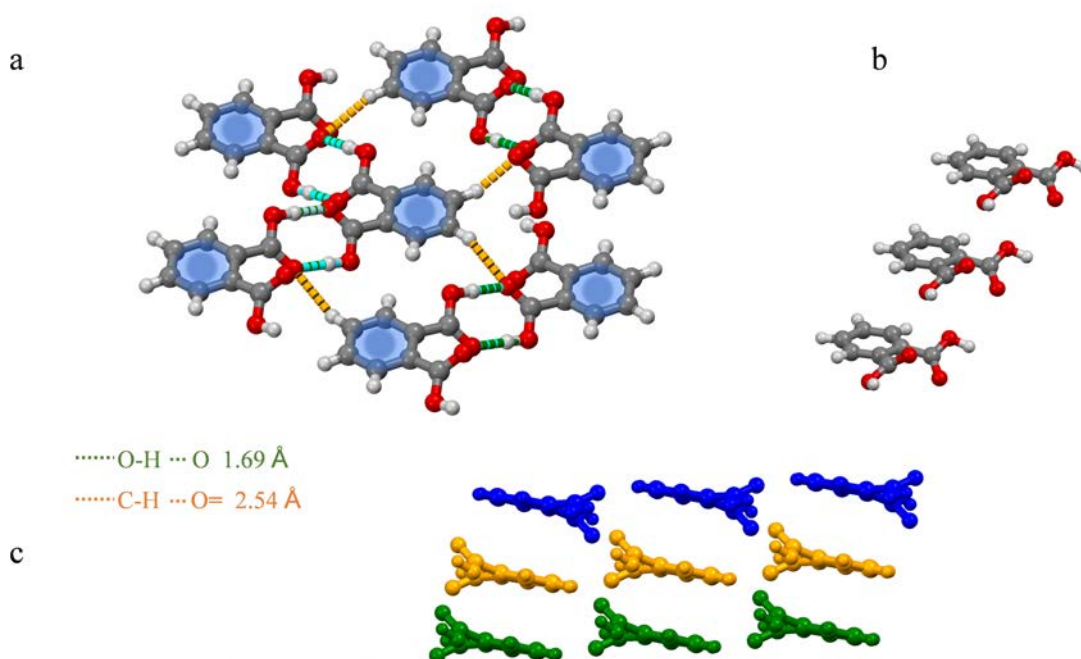

**Fig. S2** (a) Intermolecular interaction of PA. (b) The interlayer structure of PA. (c) The packing

arrangement of pure PA.

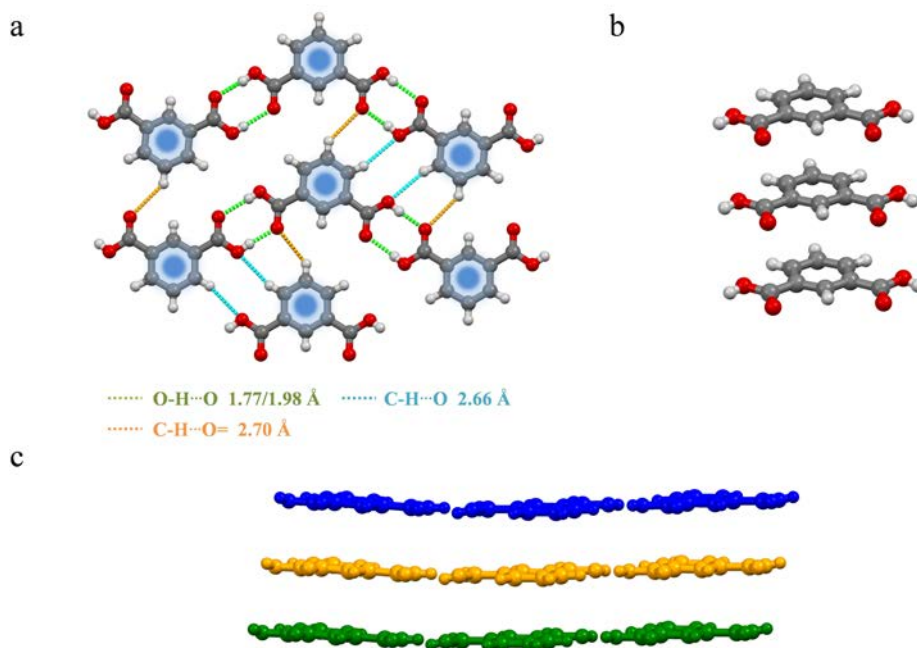

**Fig. S3** (a) The interlayer structure of IPA. (b) Intermolecular interaction of IPA. (c) The packing arrangement of pure IPA.

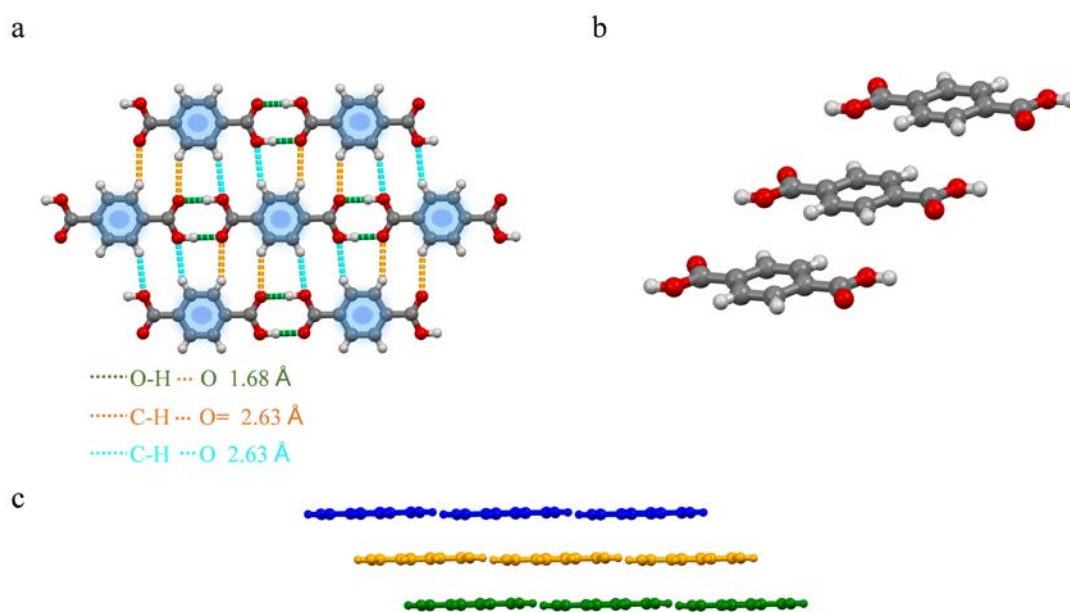

**Fig. S4** (a) Intermolecular interaction of TPA. (b) The interlayer structure of TPA. (c) The packing arrangement of pure TPA.

Crystal structures of guest (NI) and host (PA, IPA and TPA) and their packing modes. All the

crystal structure data were downloaded at the Cambridge Crystallographic Data Centre. (CCDC numbers: 146947 (**NI**), 1232671 (**PA**), 1108748 (**IPA**), 1854403 (**TPA**)).

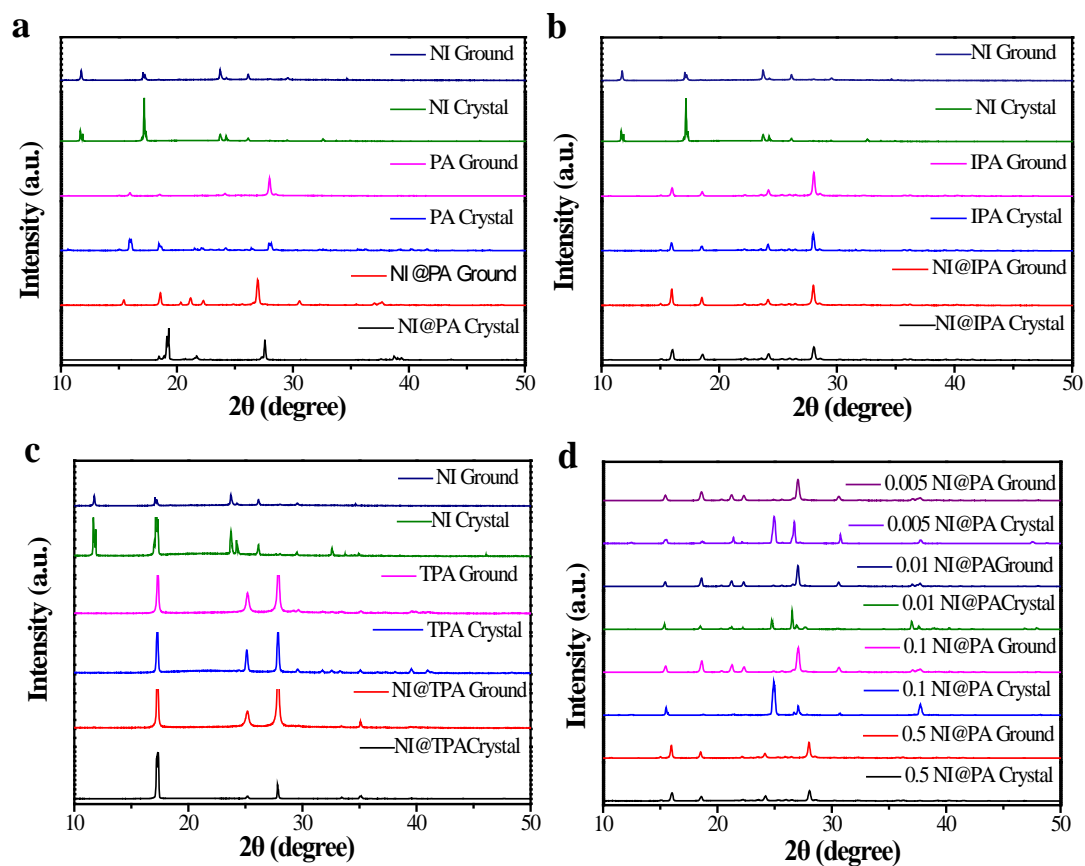

**Fig. S5** (a-c) Powder X-ray diffraction (PXRD) patterns of the doping material (**NI@PA**, **NI@IPA** and **NI@TPA**) and the corresponding individual host (**PA**, **IPA** and **TPA**) and guest (**NI**) component. (d) Powder X-ray diffraction (PXRD) pattern of **NI@PA** with varied concentration.

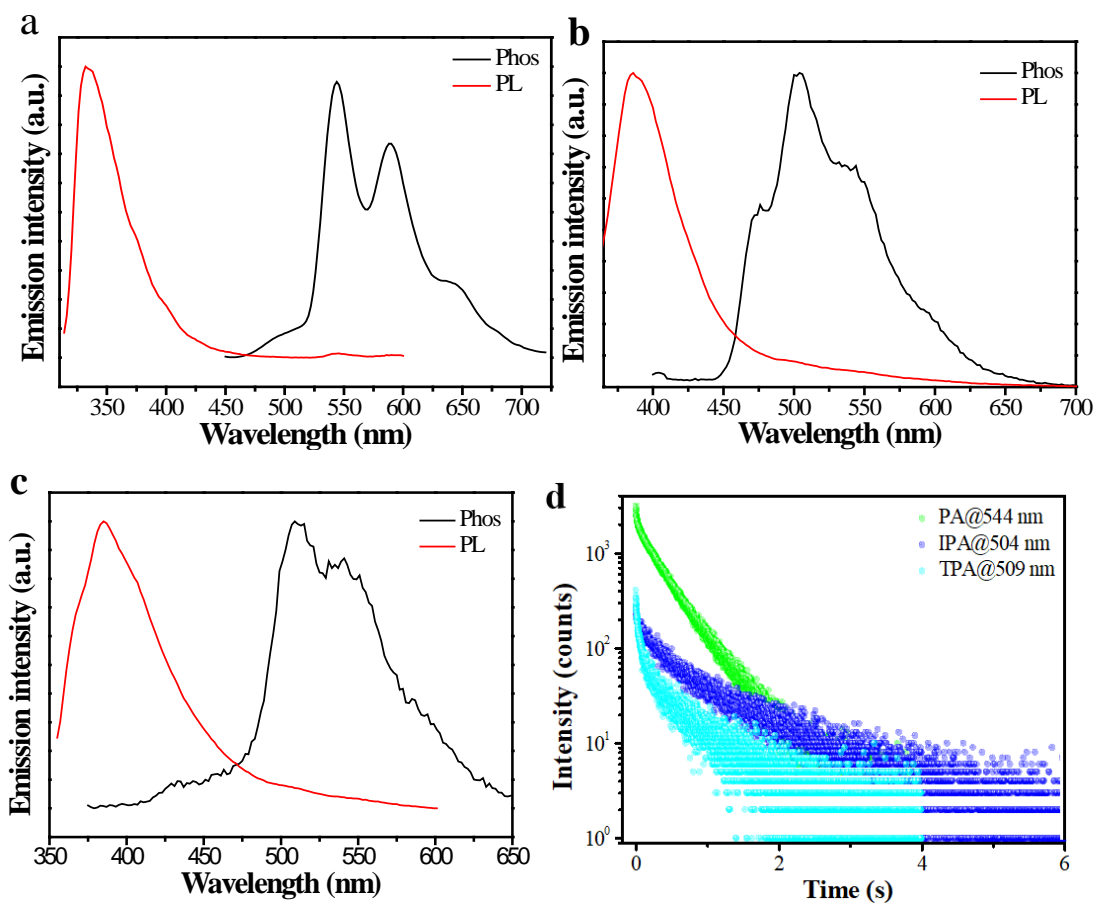

**Fig. S6** Luminescent properties of the host molecules. (a-c) steady-state photoluminescence (PL) spectrum, phosphorescence spectra of **PA**, **IPA** and **TPA** crystals at ambient conditions. (d) Time-resolved PL decay curves of **PA** at 544 nm, **IPA** at 504 nm, and **TPA** crystals at 509 nm (delayed time: 5 ms).

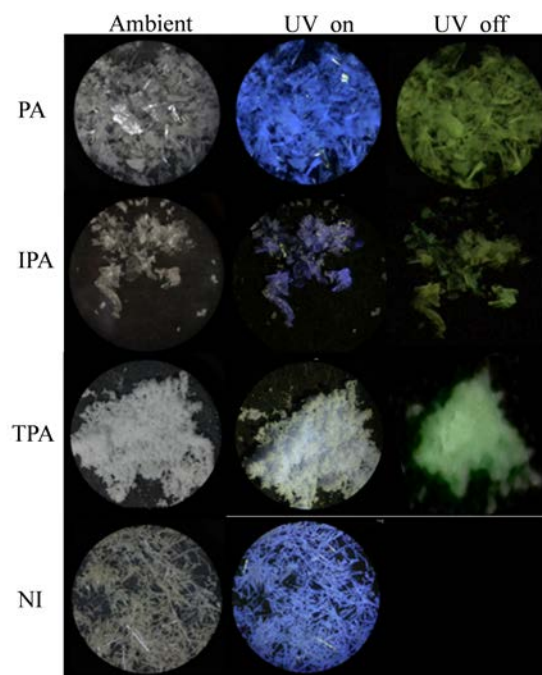

**Fig. S7** Photos of PA, IPA, TPA and NI crystals under 365 nm UV light irradiation and after the UV irradiation ceased under ambient conditions.

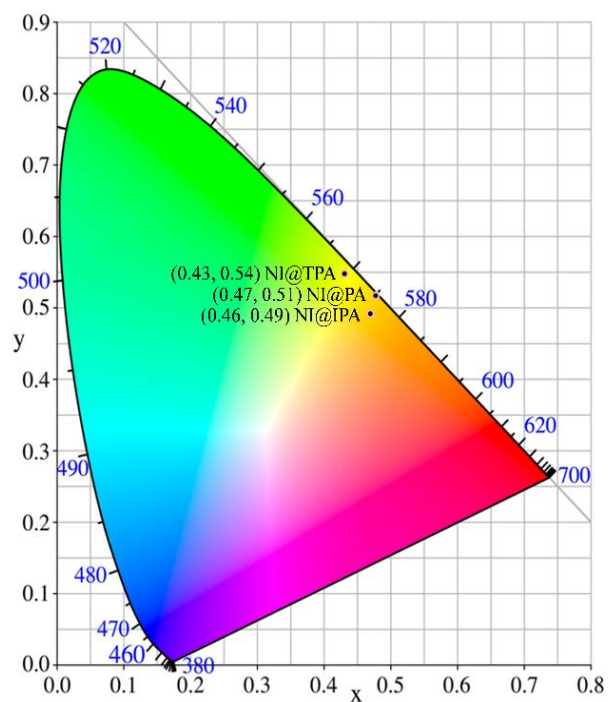

**Fig. S8** CIE 1931 coordinates of phosphorescence emission of NI@PA, NI@IPA and NI@TPA (0.02 mol %).

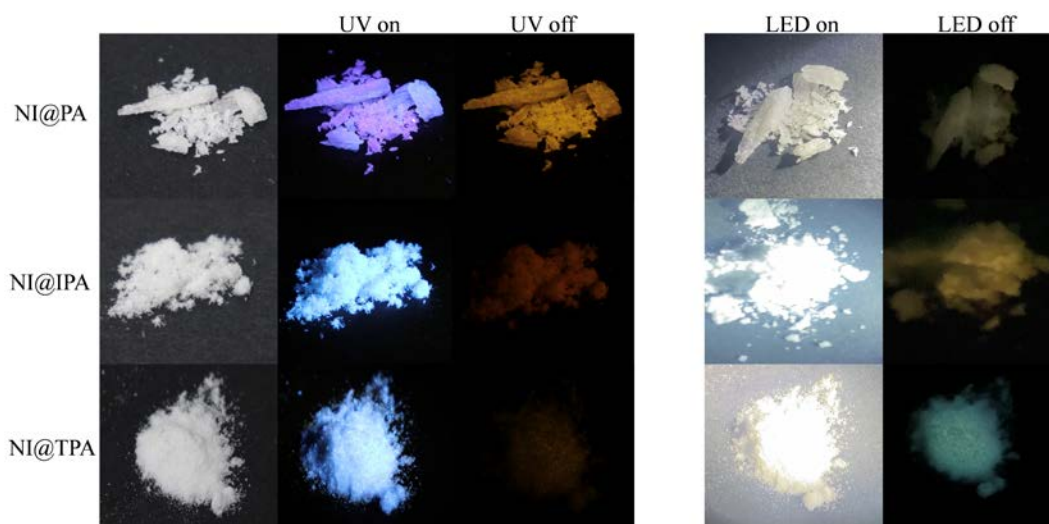

**Fig. S9** Photographs of NI@PA, NI@IPA and NI@TPA upon excitation by UV and LED and removal of light source.

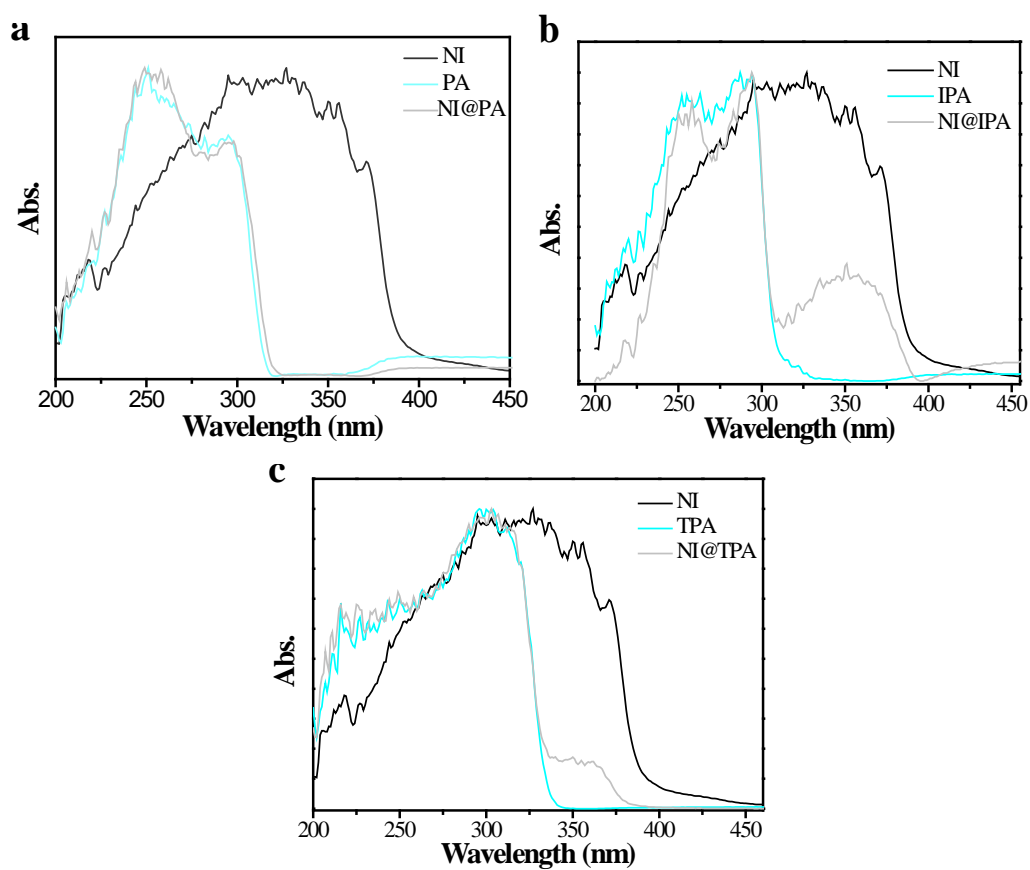

**Fig. S10** The absorption spectra of guest, host and host-guest doping system in the solid state.



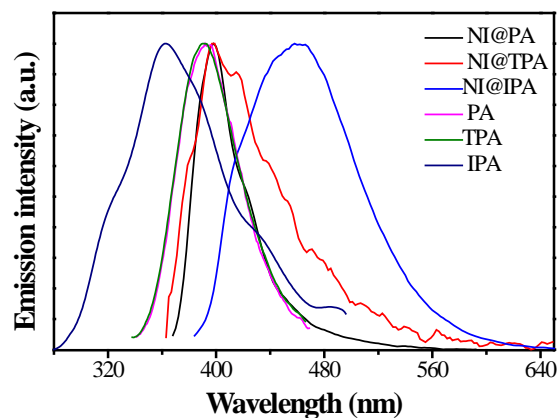

Fig. S11 The fluorescence spectra of the PA, IPA, TPA, NI@PA, NI@IPA and NI@TPA crystals.

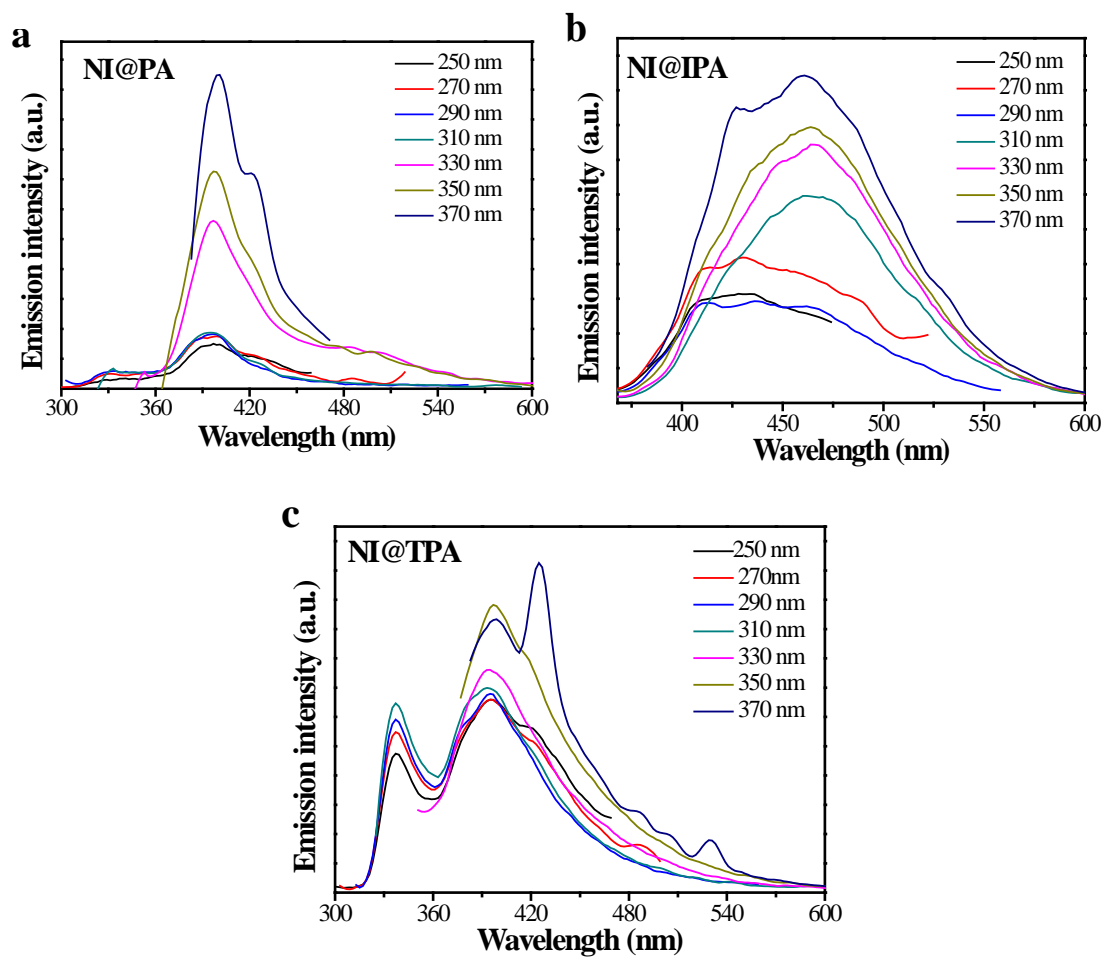

Fig. S12 (a-c) Fluorescence spectra of NI@IPA, NI@PA and NI@TPA at various excitation wavelengths at room temperature.

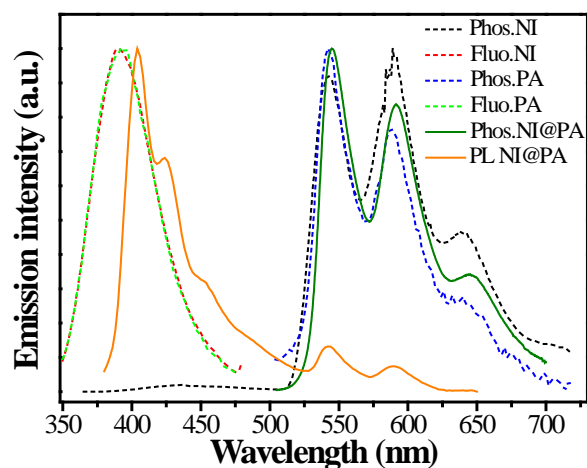

**Fig. S13** Steady state PL spectra of NI dopants in PA at 298 K (orange solid line,  $\lambda_{ex}=300$  nm); fluorescence spectra of NI (red dashed line) and PA (green dashed line); phosphorescence spectra of NI at 77 K (black dashed line), PA at 298 K (blue dashed line) and NI@PA at 298 K (green solid line).

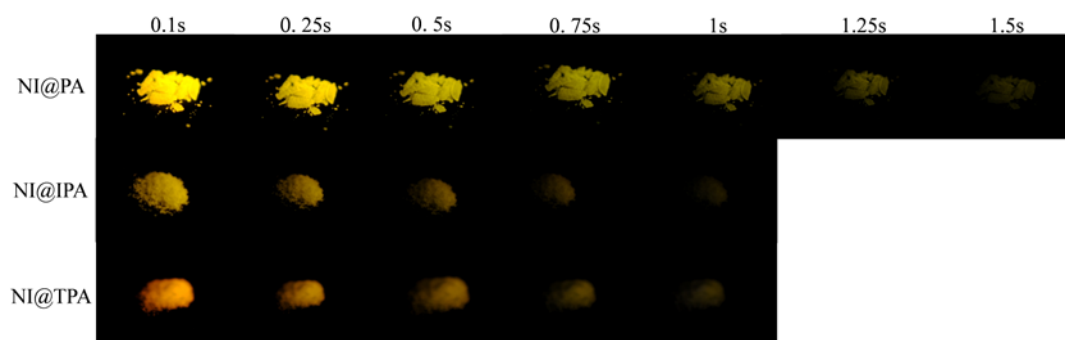

**Fig. S14** The RTP behaviors of the NI@PA, NI@IPA and NI@TPA doping Materials.

**Table S1.** Photoluminescence lifetime ( $\tau$ ) of NI, PA, IPA, TPA, NI@PA, NI@IPA and NI@TPA crystals.

|        | Wavelength (nm) | Phosphorescence |           |               |           |               |           |
|--------|-----------------|-----------------|-----------|---------------|-----------|---------------|-----------|
|        |                 | $\tau_1$ (ms)   | $A_1$ (%) | $\tau_2$ (ms) | $A_2$ (%) | $\tau_3$ (ms) | $A_3$ (%) |
| NI     |                 |                 |           |               |           |               |           |
| PA     | 544             | 100             | 9.06      | 402.16        | 90.94     |               |           |
| IPA    | 504             | 44.63           | 0.83      | 304.43        | 24.64     | 1169.45       | 74.53     |
| TPA    | 509             | 53.20           | 19.99     | 556.46        | 80.01     |               |           |
| NI@PA  | 544             | 100.00          | 2.34      | 420.95        | 97.66     |               |           |
| NI@IPA | 557             | 100.00          | 7.82      | 390.48        | 92.18     |               |           |
| NI@TPA | 547             | 341.11          | 100       |               |           |               |           |

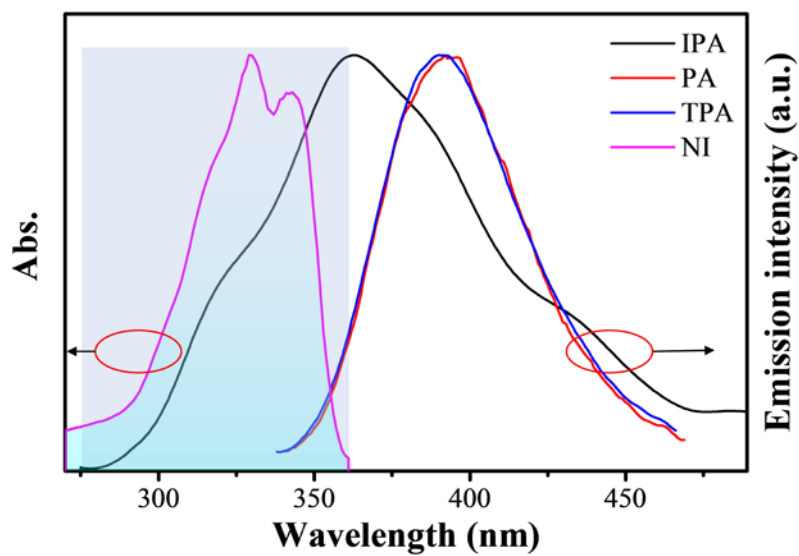

**Fig. S15** Absorption spectra of **NI** and fluorescence emission spectra of **PA**, **IPA** and **TPA** in THF ( $1 \times 10^{-5}$  M) at 298 K. The blue box highlights the spectral overlap between the emission of host (**PA**, **IPA** and **TPA**) and the absorption of the guest (**NI**).
